# Supplementary material for: Silica Nanoparticles Reinforced Ionogel as Nonvolatile and Stretchable Conductors
Source: MDPI journal article supplement (doi:10.3390/membranes10110354), 2020-11-19
Supplement: s1 [file s1]

## Electronic Supplementary Information

### Silica nanoparticles reinforced ionogel as nonvolatile and stretchable conductors

Shanshan Zhang, Zhen Li\*, Pengfei Wang\*, Pei Huang, Yamei Lu

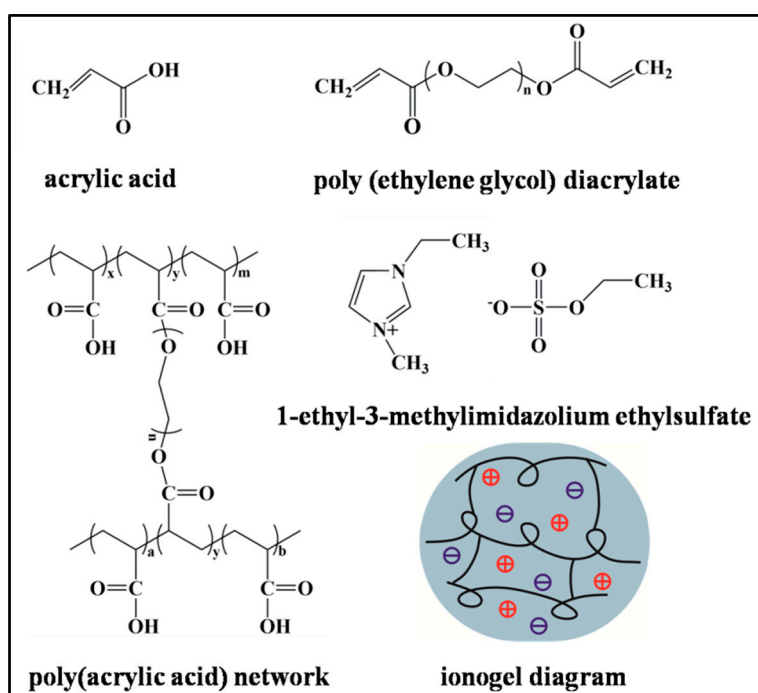

Figure S1. Schematic picture of raw materials and resultant ionogel.

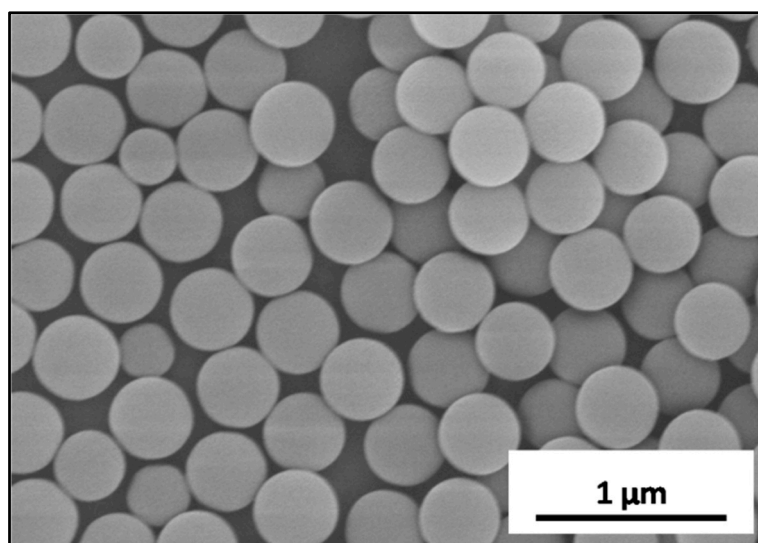

Figure S2. SEM images of Silica nanoparticles (SNP).

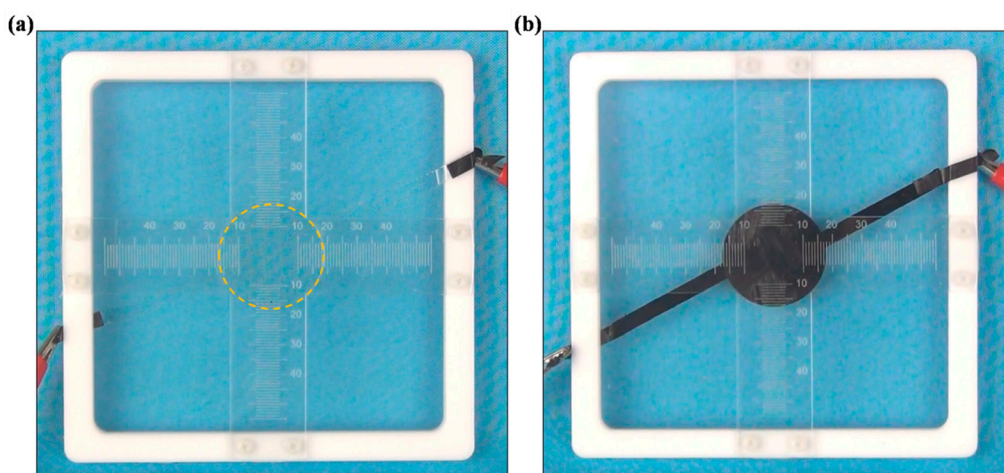

**Figure S3.** Flexible actuator construction experiment based on: (a) SNP-reinforced ionogel; (b) carbon grease.

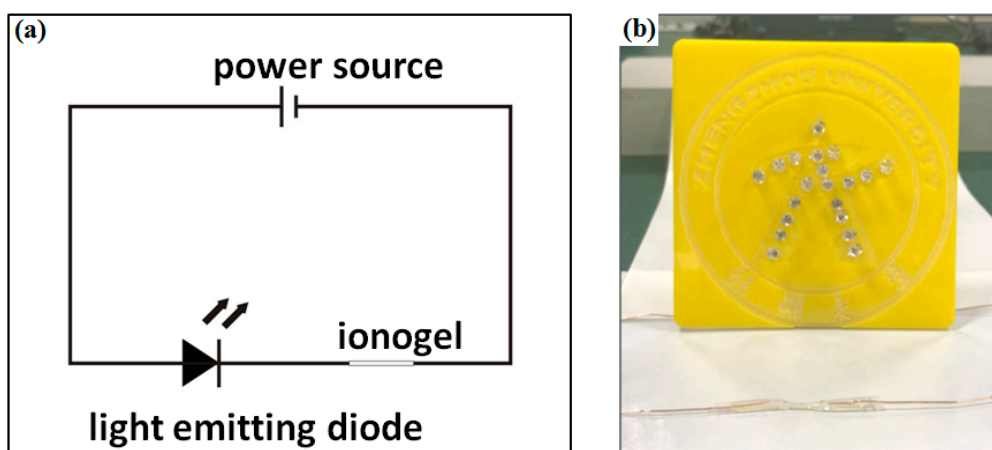

**Figure S4:** Stretchable cable based on a SNP-reinforced ionogel accessed to the light emitting diode circuit: (a) Circuit diagram; (b) Digital photo.

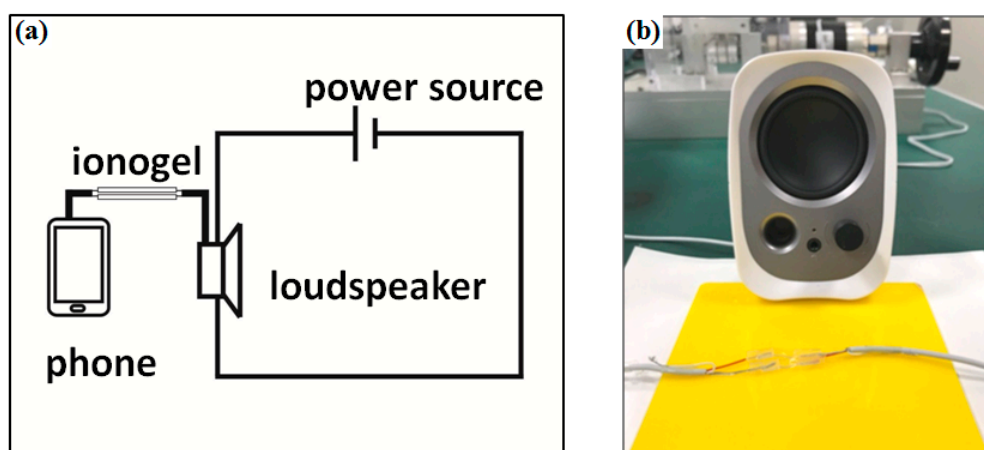

**Figure S5.** SNP-reinforced ionogel flexible wire accessed to the audio signal line:(a) The schematic diagram; (b) A digital photo.

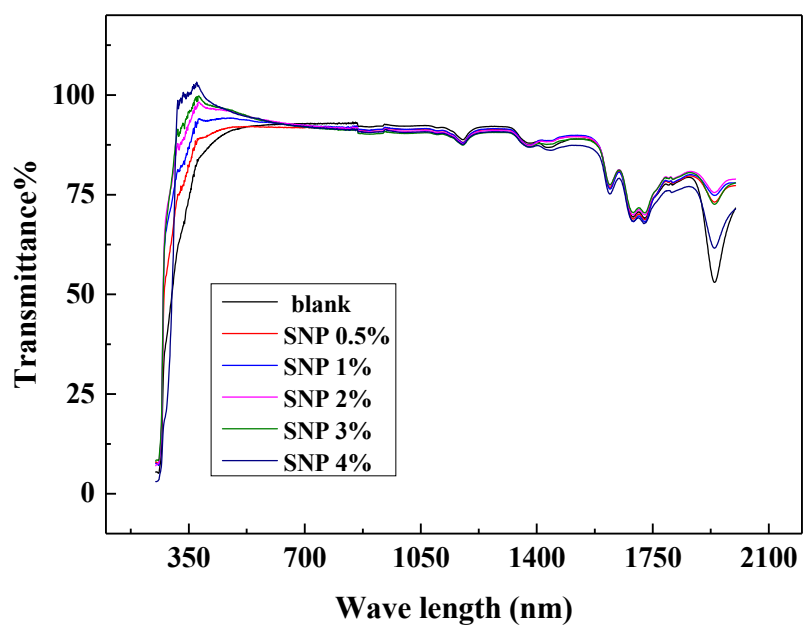

**Figure S6.** Transmission spectrum images of SNP-reinforced ionogels.

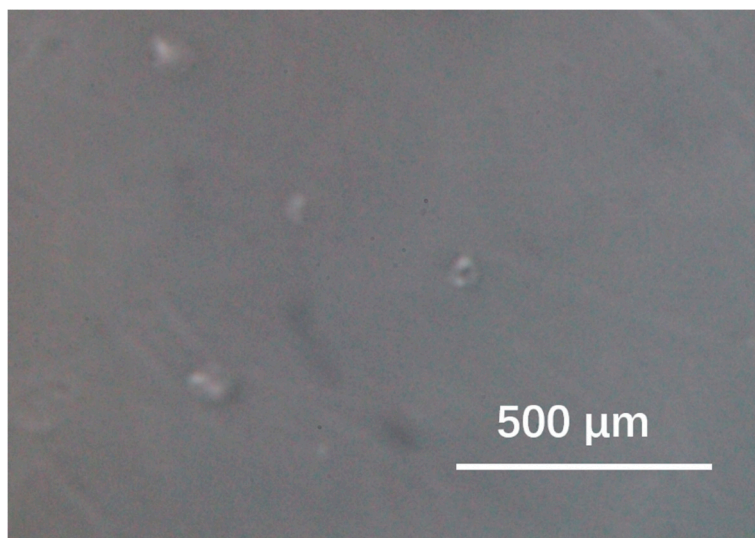

**Figure S7.** Optical microscope photos for 0.5 wt% SNP-reinforced ionogel.

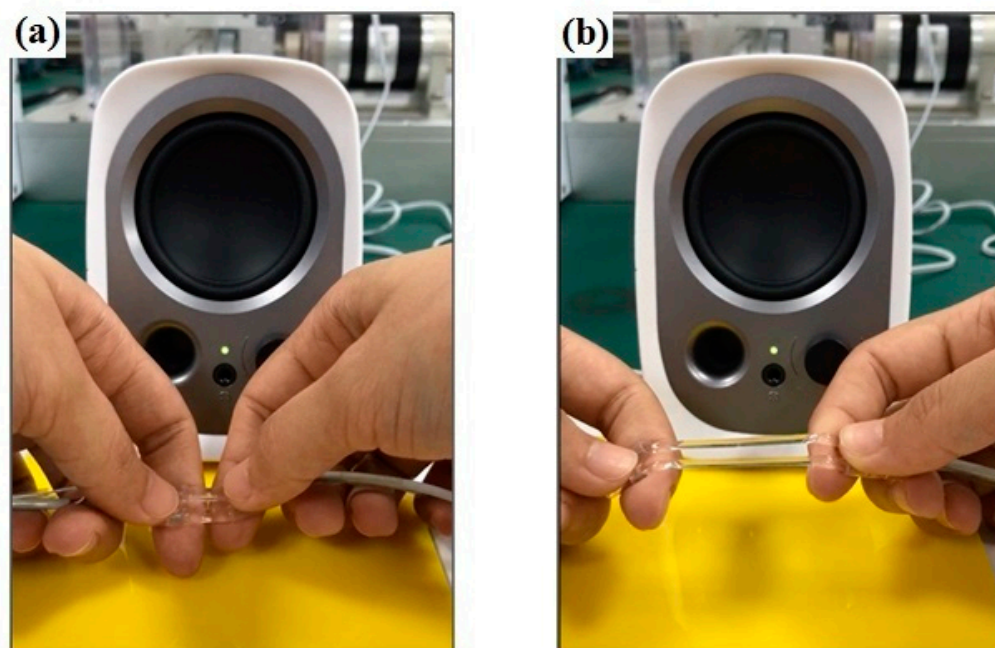

**Figure S8.** Stretching stretchable cables based on the SNP-reinforced ionogels in audio signal line

(a) A photo of stretchable cables based on SNP-reinforced ionogels without stretching;

(b) A photo of stretching stretchable cables based on SNP-reinforced ionogels.

**Table S1 The conductivity of ionogels with different contents of crosslinking agents**

| Sample   | Specific conductance (S/m) |
|----------|----------------------------|
| 0.8 mol% | $1.28 \pm 0.07$            |
| 1.2 mol% | $1.26 \pm 0.07$            |
| 1.6 mol% | $1.18 \pm 0.06$            |
| 2.0 mol% | $1.16 \pm 0.06$            |
| 2.4 mol% | $1.23 \pm 0.07$            |
